# Supplementary material for: Requirement of Leukemia Inhibitory Factor or Epidermal Growth Factor for Pre-Implantation Embryogenesis via JAK/STAT3 Signaling Pathways
Source: PubMed Central journal article supplement (PMC4838257; doi:10.1371/journal.pone.0153086), 2016-04-20
Supplement: pone.0153086.s002.pdf [file pone.0153086.s002.pdf]

S2 Table. The down-expression genes of LIF-siRNA treated mouse embryos at the morula stage in microarray test. The ratio is the normalized expression ratio (by rank consistent lowness) of comparing gene expression profiles of 2.0-fmol siRNA treated embryos to scrambled siRNA treated embryos. The analysis was performed twice for each group in order to ensure consistency of gene expression data.

| No. | UniGene   | GeneName                                                              | Ratio |
|-----|-----------|-----------------------------------------------------------------------|-------|
| 1   | Mm.29296  | RIKEN cDNA 1110003H02 gene                                            | 0.10  |
| 2   | Mm.202383 | hepatic nuclear factor 4                                              | 0.12  |
| 3   | Mm.65396  | SRY-box containing gene 2                                             | 0.13  |
| 4   | Mm.2731   | phosphatidylethanolamine N-methyltransferase                          | 0.14  |
| 5   | Mm.276116 | ankyrin-like repeat protein                                           | 0.14  |
| 6   | Mm.400747 | Eph receptor A4                                                       | 0.15  |
| 7   | Mm.288381 | fibulin 5                                                             | 0.15  |
| 8   | Mm.273379 | RIKEN cDNA 1810032P22 gene                                            | 0.15  |
| 9   | Mm.25802  | ESTs                                                                  | 0.17  |
| 10  | Mm.1894   | CD1d1 antigen                                                         | 0.18  |
| 11  | Mm.224233 | RIKEN cDNA 2810407E23 gene                                            | 0.18  |
| 12  | Mm.4462   | SH3-domain binding protein 1                                          | 0.19  |
| 13  | Mm.29210  | aplysia ras-related homolog N (RhoN)                                  | 0.20  |
| 14  | Mm.4512   | RIKEN cDNA 1110001J05 gene                                            | 0.20  |
| 15  | Mm.43636  | zinc finger protein 289                                               | 0.20  |
| 16  | Mm.245724 | RIKEN cDNA 0610011L04 gene                                            | 0.21  |
| 17  | Mm.35754  | cytosolic sorting protein Phosphofurin acidic cluster sorting protein | 0.21  |
| 18  | Mm.259795 | Ras homolog gene family, member G (RhoG)                              | 0.21  |
| 19  | Mm.252316 | glutathione synthetase                                                | 0.22  |
| 20  | Mm.76286  | ESTs                                                                  | 0.22  |
| 21  | Mm.33765  | ADP-ribosylation factor 1 GTPase activating protein                   | 0.22  |
| 22  | Mm.441439 | E74-like factor 3                                                     | 0.22  |
| 23  | Mm.33801  | ESTs                                                                  | 0.22  |
| 24  | Mm.1775   | hematological and neurological expressed sequence 1                   | 0.22  |
| 25  | Mm.41868  | RIKEN cDNA 2810405K02 gene                                            | 0.23  |
| 26  | Mm.197829 | Tu translation elongation factor, mitochondrial                       | 0.23  |
| 27  | Mm.149    | RAD52 homolog, ( <i>S. cerevisiae</i> )                               | 0.24  |
| 28  | Mm.26859  | gap junction membrane channel protein beta 5                          | 0.24  |
| 29  | Mm.394    | intercellular adhesion molecule 2                                     | 0.25  |
| 30  | Mm.687    | aplysia ras-related homolog B (RhoB)                                  | 0.25  |

|    |           |                                                                                              |      |
|----|-----------|----------------------------------------------------------------------------------------------|------|
| 31 | Mm.179349 | RIKEN cDNA 2700050C19 gene                                                                   | 0.25 |
| 32 | Mm.30907  | ESTs                                                                                         | 0.25 |
| 33 | Mm.1971   | calreticulin                                                                                 | 0.25 |
| 34 | Mm.3991   | solute carrier family 25 (mitochondrial carrier; adenine nucleotide translocator), member 10 | 0.25 |
| 35 | Mm.24714  | ESTs                                                                                         | 0.26 |
| 36 | Mm.121859 | RIKEN cDNA 2310020F24 gene                                                                   | 0.26 |
| 37 | Mm.381194 | RIKEN cDNA 2310011F05 gene                                                                   | 0.26 |
| 38 | Mm.205830 | guanosine diphosphate (GDP) dissociation inhibitor 1                                         | 0.27 |
| 39 | Mm.63549  | ESTs                                                                                         | 0.27 |
| 40 | Mm.26995  | thimet oligopeptidase 1                                                                      | 0.27 |
| 41 | Mm.39700  | ESTs                                                                                         | 0.28 |
| 42 | Mm.104955 | serine protease inhibitor, Kunitz type 1                                                     | 0.28 |
| 43 | Mm.143768 | f-box only protein 3                                                                         | 0.28 |
| 44 | Mm.982    | endothelial differentiation sphingolipid G-protein-coupled receptor 1                        | 0.30 |
| 45 | Mm.247956 | RIKEN cDNA 1200011D11 gene                                                                   | 0.30 |
| 46 | Mm.344648 | CD97 antigen                                                                                 | 0.30 |
| 47 | Mm.24173  | ESTs                                                                                         | 0.30 |
| 48 | Mm.1583   | lymphocyte antigen 6 complex, locus C                                                        | 0.30 |
| 49 | Mm.358616 | keratin complex 2, basic, gene 8                                                             | 0.30 |
| 50 | Mm.45294  | ESTs                                                                                         | 0.30 |
| 51 | Mm.298798 | cyclin-dependent kinase 5                                                                    | 0.30 |
| 52 | Mm.8180   | lymphocyte antigen 6 complex                                                                 | 0.31 |
| 53 | Mm.272675 | solute carrier family 20, member 1                                                           | 0.31 |
| 54 | Mm.41864  | RIKEN cDNA 1190005K07 gene                                                                   | 0.31 |
| 55 | Mm.29096  | nuclear receptor binding factor 1                                                            | 0.31 |
| 56 | Mm.24069  | feminization 1 a homolog ( <i>C. elegans</i> )                                               | 0.31 |
| 57 | Mm.71925  | ESTs                                                                                         | 0.32 |
| 58 | Mm.42948  | thioredoxin peroxidase, pseudogene 1                                                         | 0.32 |
| 59 | Mm.196376 | DNA segment, Chr 8, ERATO Doi 580, expressed                                                 | 0.32 |
| 60 | Mm.21912  | RIKEN cDNA 2810425J22 gene                                                                   | 0.32 |
| 61 | Mm.29778  | RIKEN cDNA 3230402M22 gene                                                                   | 0.32 |
| 62 | Mm.6700   | eukaryotic translation initiation factor 4E binding protein 1                                | 0.33 |
| 63 | Mm.23314  | ESTs                                                                                         | 0.33 |
| 64 | Mm.190650 | N-acetylglucosamine kinase                                                                   | 0.33 |
| 65 | Mm.213023 | actin, alpha 2, smooth muscle, aorta                                                         | 0.33 |
| 66 | Mm.285906 | suppressor of Ty 5 homolog ( <i>S. cerevisiae</i> )                                          | 0.33 |

|     |           |                                                                   |      |
|-----|-----------|-------------------------------------------------------------------|------|
| 67  | Mm.358698 | RIKEN cDNA 5330403M05 gene                                        | 0.33 |
| 68  | Mm.86746  | ESTs                                                              | 0.34 |
| 69  | Mm.292865 | actin, gamma 2, smooth muscle, enteric                            | 0.34 |
| 70  | Mm.42196  | nuclear protein 95                                                | 0.34 |
| 71  | Mm.4259   | tumor-associated calcium signal transducer 1                      | 0.34 |
| 72  | Mm.347009 | peroxiredoxin 2                                                   | 0.34 |
| 73  | Mm.24606  | ESTs                                                              | 0.34 |
| 74  | Mm.686    | actin, alpha, cardiac muscle                                      | 0.35 |
| 75  | Mm.24662  | S100 calcium binding protein A1                                   | 0.35 |
| 76  | Mm.469099 | proline-serine-threonine phosphatase-interacting protein 1        | 0.35 |
| 77  | Mm.257765 | chloride intracellular channel 4 (mitochondrial)                  | 0.35 |
| 78  | Mm.26743  | apolipoprotein A-I                                                | 0.35 |
| 79  | Mm.441542 | glutathione S-transferase, pi 2                                   | 0.35 |
| 80  | Mm.55181  | ESTs                                                              | 0.35 |
| 81  | Mm.34098  | ESTs                                                              | 0.35 |
| 82  | Mm.28386  | RIKEN cDNA 3110001D19 gene                                        | 0.35 |
| 83  | Mm.24255  | transducin-like enhancer of split 3, homolog of Drosophila E(spl) | 0.35 |
| 84  | Mm.31914  | ESTs                                                              | 0.35 |
| 85  | Mm.270681 | heat shock protein, 110 kDa                                       | 0.35 |
| 86  | Mm.41928  | ESTs                                                              | 0.35 |
| 87  | Mm.222329 | calcium/calmodulin-dependent protein kinase IV                    | 0.35 |
| 88  | Mm.192991 | metallothionein 1                                                 | 0.35 |
| 89  | Mm.28130  | PCTAIRE-motif protein kinase 3                                    | 0.35 |
| 90  | Mm.258633 | stress-induced phosphoprotein 1                                   | 0.36 |
| 91  | Mm.200392 | ESTs                                                              | 0.36 |
| 92  | Mm.329655 | cofilin 1, non-muscle                                             | 0.36 |
| 93  | Mm.24506  | ESTs                                                              | 0.36 |
| 94  | Mm.268383 | ribosomal protein S6 kinase, 90kD, polypeptide 2                  | 0.36 |
| 95  | Mm.130    | cytokine inducible SH2-containing protein 1                       | 0.36 |
| 96  | Mm.44197  | RIKEN cDNA 2410012F02 gene                                        | 0.36 |
| 97  | Mm.21868  | raf-related oncogene                                              | 0.36 |
| 98  | Mm.30016  | Mus musculus Gdi-1 mRNA for RhoGDI-1, complete cds                | 0.36 |
| 99  | Mm.103351 | ATP-binding cassette, sub-family A (ABC1), member 7               | 0.36 |
| 100 | Mm.23851  | ESTs                                                              | 0.37 |
| 101 | Mm.263185 | vacuolar protein sorting 45 (yeast)                               | 0.37 |
| 102 | Mm.330057 | RIKEN cDNA 2900002K07 gene                                        | 0.37 |
| 103 | Mm.4973   | zinc finger protein 147                                           | 0.37 |

|     |           |                                                                                                                  |      |
|-----|-----------|------------------------------------------------------------------------------------------------------------------|------|
| 104 | Mm.2409   | alcohol dehydrogenase 1                                                                                          | 0.37 |
| 105 | Mm.36078  | ESTs                                                                                                             | 0.37 |
| 106 | Mm.9287   | microtubule associated testis specific serine/threonine protein kinase                                           | 0.37 |
| 107 | Mm.440086 | glutathione S-transferase, mu 2                                                                                  | 0.37 |
| 108 | Mm.196289 | DNA segment, Chr 15, Wayne State University 122, expressed                                                       | 0.38 |
| 109 | Mm.38060  | ESTs                                                                                                             | 0.38 |
| 110 | Mm.38087  | ESTs                                                                                                             | 0.38 |
| 111 | Mm.213873 | integrin beta 4                                                                                                  | 0.38 |
| 112 | Mm.22240  | expressed sequence AU022188                                                                                      | 0.39 |
| 113 | Mm.29034  | ESTs, Moderately similar to unknown [H.sapiens]                                                                  | 0.39 |
| 114 | Mm.41388  | ESTs                                                                                                             | 0.39 |
| 115 | Mm.247946 | RIKEN cDNA 2310002A12 gene                                                                                       | 0.39 |
| 116 | Mm.7244   | anterior gradient 2 ( <i>Xenopus laevis</i> )                                                                    | 0.39 |
| 117 | Mm.142524 | ESTs                                                                                                             | 0.39 |
| 118 | Mm.34404  | sema domain, immunoglobulin domain (Ig), transmembrane domain (TM) and short cytoplasmic domain, (semaphorin) 4G | 0.39 |
| 119 | Mm.234502 | myosin Ic                                                                                                        | 0.39 |
| 120 | Mm.329287 | GATA-binding protein 6                                                                                           | 0.39 |
| 121 | Mm.125465 | RIKEN cDNA 3110031B13 gene                                                                                       | 0.40 |
| 122 | Mm.2055   | matrix metalloproteinase 12                                                                                      | 0.40 |
| 123 | Mm.481405 | tumor rejection antigen gp96                                                                                     | 0.40 |
| 124 | Mm.331547 | aconitase 1                                                                                                      | 0.40 |
| 125 | Mm.141758 | hemoglobin X, alpha-like embryonic chain in Hba complex                                                          | 0.40 |
| 126 | Mm.22123  | DNA segment, Chr 15, Wayne State University 75, expressed                                                        | 0.40 |
| 127 | Mm.390239 | activin receptor IIB                                                                                             | 0.41 |
| 128 | Mm.4551   | villin 2                                                                                                         | 0.41 |
| 129 | Mm.1249   | laminin, gamma 1                                                                                                 | 0.41 |
| 130 | Mm.39061  | adenylosuccinate synthetase 2, non muscle                                                                        | 0.41 |
| 131 | Mm.10     | spermidine synthase                                                                                              | 0.41 |
| 132 | Mm.262252 | small EDRK-rich factor 2                                                                                         | 0.41 |
| 133 | Mm.157778 | RIKEN cDNA 2610034E13 gene                                                                                       | 0.41 |
| 134 | Mm.274846 | integrin linked kinase                                                                                           | 0.41 |
| 135 | Mm.17911  | lectin, galactose binding, soluble 6                                                                             | 0.41 |
| 136 | Mm.38492  | ESTs, Weakly similar to FOR4 MOUSE FORMIN 4 [M.musculus]                                                         | 0.41 |
| 137 | Mm.6994   | hydroxyacyl-Coenzyme A dehydrogenase, type II                                                                    | 0.41 |
| 138 | Mm.341434 | lectin, galactose binding, soluble 9                                                                             | 0.41 |

|     |           |                                                                                                                |      |
|-----|-----------|----------------------------------------------------------------------------------------------------------------|------|
| 139 | Mm.12393  | ESTs                                                                                                           | 0.42 |
| 140 | Mm.28426  | ESTs, Highly similar to histone acetyltransferase [H.sapiens]                                                  | 0.42 |
| 141 | Mm.43345  | ESTs                                                                                                           | 0.42 |
| 142 | Mm.317331 | Yamaguchi sarcoma viral (v-yes-1) oncogene homolog                                                             | 0.42 |
| 143 | Mm.424974 | MARCKS-like protein                                                                                            | 0.42 |
| 144 | Mm.334144 | SWAP complex protein, 70 kDa                                                                                   | 0.42 |
| 145 | Mm.2923   | interleukin 2 receptor, gamma chain                                                                            | 0.42 |
| 146 | Mm.290442 | polycystic kidney disease 1 homolog                                                                            | 0.42 |
| 147 | Mm.2230   | dead ringer homolog 1 (Drosophila)                                                                             | 0.42 |
| 148 | Mm.273538 | tubulin, beta 5                                                                                                | 0.42 |
| 149 | Mm.22594  | ESTs, Moderately similar to ZINC FINGER PROTEIN 32 [Homo sapiens]                                              | 0.43 |
| 150 | Mm.88645  | testis derived transcript                                                                                      | 0.43 |
| 151 | Mm.39061  | adenylosuccinate synthetase 2, non muscle                                                                      | 0.43 |
| 152 | Mm.3179   | immunoglobulin mu binding protein 2                                                                            | 0.43 |
| 153 | Mm.214950 | actin, alpha 1, skeletal muscle                                                                                | 0.43 |
| 154 | Mm.291235 | diacylglycerol kinase, alpha (80 kDa)                                                                          | 0.43 |
| 155 | Mm.33253  | DNA segment, Chr 2, Brigham & Women's Genetics 0886 expressed                                                  | 0.43 |
| 156 | Mm.30155  | ATPase, H <sup>+</sup> transporting, lysosomal (vacuolar proton pump) 16kD                                     | 0.43 |
| 157 | Mm.44225  | ribosomal protein, mitochondrial, L26                                                                          | 0.44 |
| 158 | Mm.33584  | ESTs, Weakly similar to C46027 neurotransmitter transporter - mouse [M.musculus]                               | 0.44 |
| 159 | Mm.27406  | ESTs                                                                                                           | 0.44 |
| 160 | Mm.141587 | DNA-binding protein A                                                                                          | 0.45 |
| 161 | Mm.19182  | hepsin                                                                                                         | 0.45 |
| 162 | Mm.244975 | breast cancer 1                                                                                                | 0.45 |
| 163 | Mm.196627 | core promoter element binding protein                                                                          | 0.45 |
| 164 | Mm.221403 | platelet derived growth factor receptor, alpha polypeptide                                                     | 0.45 |
| 165 | Mm.5220   | histone gene complex 2                                                                                         | 0.45 |
| 166 | Mm.41272  | Mus musculus adult male liver cDNA, RIKEN full-length enriched library, clone:1300016P12, full insert sequence | 0.45 |
| 167 | Mm.4651   | kinesin-associated protein 3                                                                                   | 0.45 |
| 168 | Mm.38993  | calsyntenin 1                                                                                                  | 0.45 |
| 169 | Mm.29320  | ESTs                                                                                                           | 0.45 |
| 170 | Mm.379002 | ribosomal protein L28                                                                                          | 0.46 |
| 171 | Mm.177650 | RIKEN cDNA 1300003D18 gene                                                                                     | 0.46 |
| 172 | Mm.141864 | FK506 binding protein 8 (38 kDa)                                                                               | 0.46 |

|     |           |                                                                                                  |      |
|-----|-----------|--------------------------------------------------------------------------------------------------|------|
| 173 | Mm.589    | glucose phosphate isomerase 1 complex                                                            | 0.46 |
| 174 | Mm.36417  | ESTs, Weakly similar to unnamed protein product [H.sapiens]                                      | 0.46 |
| 175 | Mm.8142   | faciogenital dysplasia homolog                                                                   | 0.46 |
| 176 | Mm.290868 | target of myb1 homolog (chicken)                                                                 | 0.46 |
| 177 | Mm.156    | downstream of tyrosine kinase 1                                                                  | 0.46 |
| 178 | Mm.358633 | splicing factor 3a, subunit 2, 66kD                                                              | 0.46 |
| 179 | Mm.12758  | FK506 binding protein 4 (59 kDa)                                                                 | 0.46 |
| 180 | Mm.3544   | calcium channel beta 3 subunit                                                                   | 0.47 |
| 181 | Mm.29728  | DNA segment, Chr 13, Wayne State University 156, expressed                                       | 0.47 |
| 182 | Mm.386752 | ancient ubiquitous protein                                                                       | 0.47 |
| 183 | Mm.87586  | ESTs, Moderately similar to DRPLA [H.sapiens]                                                    | 0.47 |
| 184 | Mm.30456  | ESTs, Weakly similar to T29012 hypothetical protein ZK328.7 - Caenorhabditis elegans [C.elegans] | 0.47 |
| 185 | Mm.1129   | repeat family 3 gene                                                                             | 0.47 |
| 186 | Mm.266972 | double C2, gamma                                                                                 | 0.47 |
| 187 | Mm.31552  | ESTs, Weakly similar to I49441 Mouse 19.5 mRNA, complete cds - mouse [M.musculus]                | 0.48 |
| 188 | Mm.34283  | ESTs                                                                                             | 0.48 |
| 189 | Mm.22895  | ESTs                                                                                             | 0.48 |
| 190 | Mm.28896  | phosphatidylcholine transfer protein-like                                                        | 0.48 |
| 191 | Mm.236443 | fatty acid synthase                                                                              | 0.48 |
| 192 | Mm.7271   | nuclear RNA export factor 1 homolog ( <i>S. cerevisiae</i> )                                     | 0.48 |
| 193 | Mm.439922 | RIKEN cDNA 0610031J06 gene                                                                       | 0.48 |
| 194 | Mm.271711 | transgelin 2                                                                                     | 0.48 |
| 195 | Mm.265347 | annexin A6                                                                                       | 0.48 |
| 196 | Mm.19726  | dynein, axon, heavy chain 11                                                                     | 0.48 |
| 197 | Mm.12917  | multiple endocrine neoplasia 1                                                                   | 0.48 |
| 198 | Mm.356689 | acyl-Coenzyme A oxidase                                                                          | 0.49 |
| 199 | Mm.271809 | Fas death domain-associated protein                                                              | 0.49 |
| 200 | Mm.27291  | cyclin D3                                                                                        | 0.49 |
| 201 | Mm.4222   | triosephosphate isomerase                                                                        | 0.49 |
| 202 | Mm.27921  | ESTs, Highly similar to GAK RAT CYCLIN G-ASSOCIATED KINASE [R.norvegicus]                        | 0.49 |
| 203 | Mm.23298  | ESTs                                                                                             | 0.49 |
| 204 | Mm.22067  | transmembrane domain protein regulated in adipocytes 40 kDa                                      | 0.49 |
| 205 | Mm.3130   | kinesin heavy chain member 4                                                                     | 0.49 |
| 206 | Mm.46176  | RIKEN cDNA 1500041B02 gene                                                                       | 0.49 |
| 207 | Mm.236868 | ribosomal protein S3                                                                             | 0.49 |

|     |           |                                                                               |      |
|-----|-----------|-------------------------------------------------------------------------------|------|
| 208 | Mm.31942  | ESTs, Highly similar to hypothetical protein [M.musculus]                     | 0.50 |
| 209 | Mm.306256 | heat shock protein, 84 kDa 1                                                  | 0.50 |
| 210 | Mm.1081   | ATPase, H <sup>+</sup> transporting, lysosomal (vacuolar proton pump), 42 kDa | 0.50 |
| 211 | Mm.277661 | low density lipoprotein receptor-related protein associated protein 1         | 0.50 |
| 212 | Mm.29133  | budding uninhibited by benzimidazoles 1 homolog, beta (S. cerevisiae)         | 0.50 |
| 213 | Mm.371592 | ubiquitin B                                                                   | 0.50 |
| 214 | Mm.22228  | gene rich cluster, C8 gene                                                    | 0.50 |
| 215 | Mm.30262  | Kruppel-like factor 5                                                         | 0.50 |
| 216 | Mm.31858  | ESTs                                                                          | 0.50 |
